# Supplementary material for: Wake-sleep cycles are severely disrupted by diseases affecting cytoplasmic homeostasis
Source: PubMed Central journal article supplement — Proc Natl Acad Sci U S A. 2020 Oct 26;117(45):28402–11. doi: 10.1073/pnas.2003524117 (PMC7668169; doi:10.1073/pnas.2003524117), 2020-10-26
Supplement: pnas.2003524117.sapp.pdf [file pnas.2003524117.sapp.pdf]

1 **Supplementary Materials**

2  
3  
4 **Wake-sleep cycles are severely disrupted by diseases affecting cytoplasmic**  
5 **homeostasis**

**Authors:** Stephen Beesley<sup>1,†</sup>, Dae Wook Kim<sup>2,†</sup>, Matthew D'Alessandro<sup>1,‡</sup>, Yuanhu Jin<sup>1</sup>,  
Kwangjun Lee<sup>1</sup>, Hyunjeong Joo<sup>1,3</sup>, Young Yang<sup>3</sup>, Robert J. Tomko Jr<sup>1</sup>, John Faulkner<sup>4</sup>, Joshua  
Gamsby<sup>4</sup>, Jae Kyoung Kim<sup>2,\*</sup>, Choogon Lee<sup>1,\*</sup>

6  
7 Correspondence: [Choogon.lee@med.fsu.edu](mailto:Choogon.lee@med.fsu.edu) and [jaekkim@kaist.ac.kr](mailto:jaekkim@kaist.ac.kr)  
8  
9

10 **This PDF file includes:**

11 **Materials and Methods**

12 **Supplemental figures:**

13  
14  
15  
16 Fig. S1. Modulation of circadian rhythms by different autophagy conditions is conserved in both  
17 MEF and U2OS cells.

18  
19 Fig. S2. Disruption of circadian rhythms by autophagy inhibitors are specific to the circadian  
20 clock.

21  
22 Fig. S3. Tamoxifen itself does not produce a circadian phenotype.

23  
24 Fig. S4. No two mice show similar wake-sleep cycles.

25  
26 Fig. S5. PER2-Venus is regulated by CK1 $\delta$  in the same manner as PER2.

27  
28 Fig. S6. Strong cooperativity in the multisite phosphorylation leads to the bistability in PER  
29 hyperphosphorylation.

30  
31 Fig. S7. The bistability is disabled in overcrowded cells.

32  
33 Fig. S8. Worsening of circadian disruption is associated with aging in *P62* mutant mice.

34  
35 Fig. S9. Spatial regulation of PER is critical for temporal manifestation of PER rhythms.

36  
37 Fig. S10. Description of model components and agent mobility.

38  
39 **Other Supplementary Materials for this manuscript include the following:**

40  
41 Movie S1. Real time monitoring of PER2-Venus trafficking in U2OS cells.

43 **Materials and methods**

44

45 **Genotyping: PCR Primers**

46

47 *Atg5<sup>Flox</sup>* and wt alleles:

48

49 Fwd: 5'gaatatgaaggcacaccctgaaatg3'

50 Rev: 5'gtactgcataatggttaactcttgc3'

51 neo casset fwd: 5'acaacgtcgagcacagctgcgcaagg3'

52

53 Amplicon: wt ~357 bp; floxed ~700 bp

54

55 *P62<sup>-/-</sup>* and wt alleles:

56

57 p62 geno\_1: 5'CTGCATGTCTTCTCCCATGAC3'

58 p62 geno\_2: 5'TAGATACCTAGGTGAGCTCTG3'

59 p62 geno\_3: 5'CTTACGGGTCCTTTTCCCAAC3'

60 p62 geno\_4: 5'TCCTCCTTGCCCAGAAGATAG3'

61

62 Amplicon: ~wt 300 bp; ko ~600 bp

63

64 CAG-cre-ER:

65 FW: 5'ccagcaacatttgggcca3'

66 Rev: 5'cccaccgtcagtagtgaga3'

67

68 Amplicon: ~wt no band; tg ~260 bp

69

70 *Per2<sup>Luc</sup>*

71

72 Fw: 5'ctgtgttactgagagag3'

73 Rev: 5'gggtccatgtgattagaaac3'

74 Luciferase rev: 5'taaaaccgggagtagatgaga3'

75

76 Amplicon: ~wt 230 bp; KI ~680 bp

77

78

79 **Analysis of circadian behavioral rhythms**

80

81 All mice were individually housed in wheel-running cages, with free access to food and water  
82 except the mice described in Fig 1D. Wheel running activity was recorded and analyzed using  
83 ClockLab (Actimetrics, Wilmette, IL). Since it is not possible to calculate long-term periods and  
84 statistical values due to unstable phase angle in all individual *Atg5* and *P62* mutant mice, short-  
85 term periods were calculated over a short duration where phase angle is stable (1-2 weeks) in  
86 individual mutant mice. Free-running period was calculated using a Chi-square periodogram with  
87 six-minute resolution between hours 10 and 36 (ClockLab). In Fig. 1C and fig. S4, all animals  
88 were initially placed in a 12h light:12h dark (LD) cycle, for at least 7 days. Mice were then  
89 transferred to constant darkness (DD), for approximately two weeks, to measure baseline activity.  
90 *Atg5* deletion was induced in the whole body in *Atg5<sup>fl/+</sup>* or *Atg5<sup>fl/fl</sup>/CAG-CreEsr-1* mutant mice by  
91 feeding them tamoxifen-containing chow (Harlan TD.130859; 0.4g tamoxifen/kg food) for two  
92 weeks. The wt control received the same treatment. We showed that this tamoxifen treatment  
93 does not induce circadian disruption in wt and floxed mutant mice without the cre transgene (1).

94 After two weeks, any remaining tamoxifen chow was removed and replaced with regular mouse  
95 chow for the remainder of the recordings. In Fig. 1E, C57BL/6J mice were entrained in LD cycles  
96 followed by DD for 2 weeks, showing the baseline activity. A hypocalorie diet (2/3 of daily  
97 consumption) was given at ZT12 of the previous LD cycle for 12 days (indicated by the green  
98 line) before returning to ad libitum. The red line indicates continuous activity onset if the mice  
99 had not been subjected to starvation. The circadian period before starvation and from the last 7  
100 days during starvation was calculated and compared by paired t-test.

101 For Fig 6A, Locomotor, period and activity levels of Tg4510 and non-transgenic litter  
102 mate controls were calculated as previously described (2). Briefly, 3-month-old male and female  
103 mice (n=8 each) were individually housed with *ad libitum* access to food and water in a 12:12  
104 light/dark cycle (LD). Mice were then moved to running wheel cages (Lafayette Instrument,  
105 Lafayette, IN) in light-tight, sound-attenuated cabinets and entrained to a 12:12 LD cycle for ~9  
106 days. To assess free-running period, mice were then exposed to constant darkness (DD) for ~14  
107 days. Activity data was recorded in 5 min bins using Scurry Activity Monitoring Software  
108 (Lafayette Instrument, Lafayette, IN). Period and activity levels were calculated using Clocklab  
109 (Version 6; Actimetrics, Wilmette, IL).

## 110 Antibodies

111  
112 Antibodies to clock proteins were generated against recombinant clock proteins expressed and  
113 have been previously reported (3-5). PER1-GP62, PER2-GP58, human PER2-GP49 (U2OS),  
114 BM1-2-GP, C1-GP (CRY1), CK1 $\delta$ -GP and CK1 $\epsilon$ -GP antibodies were used at 1:1,000 dilution in  
115 5% milk-Tris-buffered saline containing 0.05% Tween 20 solution. PER1-GP62 and human  
116 PER2-GP49 antibodies were used for immunoblots of U2OS samples and ICC in Fig S10. These  
117 antibodies have been validated using knockout tissue samples. Rabbit anti-ACTIN antibody  
118 (Sigma, A5060) was used at 1:2,000. Anti-LC3 and P62 antibodies were from Cell Signaling  
119 (#12741) and Abcam (#56416), respectively.

## 120 Adenoviral vectors and plasmids

121  
122 The inducible *Per2-Venus* transgene was generated by knocking in the Venus sequence between  
123 the last amino acid codon and stop codon in the previously described inducible tetO-Per2; CMV-  
124 rtTA-pAdTrack plasmid (6). The Track vector was subsequently cut with PmeI for linearization  
125 and then transformed into the *E. coli* BJ5183 strain, together with the pAdEasy adenoviral  
126 backbone vector, to generate a complete adenoviral vector through *in vivo* recombination.  
127 Generation and purification of the recombinant adenovirus was also performed as described  
128 previously (7). Titers of the purified virus to achieve >95% infection efficiency were determined  
129 by counting green fluorescent protein (GFP)-expressing cells, in culture plates, infected with  
130 different concentrations of adenoviruses (8). In Fig. 2 and movie S1, induction of PER2-Venus  
131 was stopped for 12 hrs by replacing doxycycline DMEM (2 ug/ul dox) with fresh DMEM before  
132 the images and movies were taken. For Fig 2H, U2OS cells were further treated with control  
133 100% DMEM, 5% AA medium or 5% AA + 2mM 3-MA for another 12 hrs before the images  
134 were taken. For Fig 2I, the cells were further monitored for 27 hrs under the normal medium  
135 100% DMEM. For Fig 2K, the inducible Per2-Venus Track plasmid and a *CMV-mCerulean3-*  
136 *LaminB1* plasmid were cotransfected into U2OS cells which then were subjected to 5% AA  
137 medium for 12 hrs to demonstrate that the Per2-Venus ring is outside the nucleus. For Fig S5C,  
138 the inducible Per2-Venus Track plasmid and pcDNA-CK1 $\delta$  were cotransfected into U2OS cells.  
139 The images were taken 12 hrs later after induction had been discontinued. 200 ng Per2-Venus  
140 plasmid and 500 ng CK1 $\delta$  plasmid were used. For Adenoviruses expressing *Per2* promoter-*Per2*  
141 cDNA (*Per2-cPer2*), *Per2* promoter-luciferase reporter (*Per2-luc*) and *CMV-Egfp* (control) used  
142

143 in Fig. 5F were described previously (8). For Fig. 5F, *Egfp* adenovirus was co-infected with *Per2-*  
144 *Luc* adenovirus in control and adipocyte samples whereas, in rescued samples, *Per2-cPer2*  
145 adenovirus was co-infected with *Per2-Luc* adenovirus. *pcDNA-Per1*, *Per2* and *CK1δ* and *CK1ε*  
146 plasmids were described previously (8).

### 149 **Transfection, Immunoblotting and Immunocytochemistry**

150  
151 *Per1*, *Per2*, *CK1δ* plasmids were transfected into HEK293a cells using Qiagen's PolyFect  
152 Transfection Reagent. Briefly, the PolyFect reagent was mixed with 1μg plasmid DNA and  
153 combined with 150μL of DMEM. The solution was mixed briefly and incubated at room  
154 temperature for 10 minutes. The mixture was added to the cell medium and incubated for 48  
155 hours before harvest. For Fig 4F, 300 ng *Per1* and 50 ng *CK1δ* were used for transfection. If  
156 *CK1δ* is used more than 500 ng, the mutant PER1 can be also hyperphosphorylated to some level  
157 probably due to random interaction instead of the stoichiometric interaction.

158  
159 The cells in 6 cm dishes were harvested and flash-frozen on dry ice. Protein extraction and  
160 immunoblotting were performed as previously described (6). Briefly, tissues or cells were  
161 homogenized at 4°C in 10 volumes of extraction buffer (EB) (0.4M NaCl, 20mM HEPES (pH  
162 7.5), 1mM EDTA, 5mM NaF, 1 mM dithiothreitol, 0.3% Triton X-100, 5% glycerol, 0.25mM  
163 phenylmethylsulfonyl fluoride, 10mg of aprotinin per ml, 5mg of leupeptin per ml, 1mg of  
164 pepstatin A per ml). Homogenates were cleared by centrifugation for 12 min, 12,000g at 4°C.  
165 Supernatants were mixed with 2x sample buffer and boiled. Proteins were separated by  
166 electrophoresis through SDS polyacrylamide gels and then transferred to nitrocellulose  
167 membranes. Membranes were blocked with 5% non-fat dry milk in Tris-buffered saline  
168 containing 0.05% Tween-20, incubated with primary antibodies overnight followed by incubation  
169 with secondary antibodies for 1 hr. The blots were developed using an enhanced  
170 chemiluminescence substrate (WestFemto, ThermoFisher Scientific).

171  
172 Tissue collection and western blot analysis of pTau levels were performed as previously described  
173 (9). Briefly, after the evaluation of free-running period in DD, mice were euthanized by cervical  
174 dislocation and rapid decapitation, brains were harvested, and the hypothalamus was dissected  
175 before being flash frozen for further processing. Hypothalamic tissue was lysed in M-PER with  
176 phosphatase and protease inhibitors using sonication. Protein concentrations were determined  
177 using a BCA assay kit (Thermo Scientific). Equal amounts of protein from brain lysate (30 μg)  
178 were resolved using 9.5% Tris-glycine polyacrylamide gels under reducing conditions. Proteins  
179 were transferred to nitrocellulose membranes (Bio-rad, Hercules CA), and blocked for 1 h at  
180 room temperature in blocking buffer which was a 5% non-fat milk (Labscientific, Inc.,  
181 Livingston, NJ) and tris-buffered saline containing 0.1% Tween-20 solution (Boston Bioproducts,  
182 Ashland, MA). Membranes were then incubated overnight at 4 °C with either anti-phospho-tau  
183 (pSer<sup>396</sup>) at 1:1000, (Anaspec, Fremont, CA) or anti-B-Actin at 1:7500 (Sigma-Aldrich, St Louis,  
184 MO), washed 3 × 10 min in tris-buffered saline with 0.1% Tween-20 (TBS-T) then placed in  
185 blocking buffer combined with HRP-conjugated secondary antibody diluted 1:7500 and left to  
186 incubate at room temperature for 1 h. After thorough washing with TBS-T, bands were visualized  
187 using enhanced chemiluminescence (ECL; Thermo scientific) with an image analyzer (Amersham  
188 imager 600).

189  
190 For ICC, U2OS cells were plated on glass cover slips in six-well plates and grown to 50%  
191 confluency. The cells were treated with 50% horse serum and fixed 36 hrs later with 4%  
192 paraformaldehyde (PFA) in 1X PBS for ten minutes on a shaker at room temperature. The PFA

193 was then washed off with 1X PBS three times for five minutes per wash. The cells were then  
194 blocked in 5% fetal bovine serum (FBS) supplemented with 0.5% TritonX-100 in PBS for 30  
195 minutes at room temperature. The cells were incubated in 1:300 dilutions of PER1-GP62 or  
196 human PER2-GP49 antibody overnight, at 4°C, on a shaker. The following day, the primary  
197 antibodies were removed, and the cells were washed in 1x PBS 3 times for 5 minutes per wash. A  
198 Texas Red-conjugated, goat anti-guinea pig IgG (H+L) secondary antibody (Thermo Scientific  
199 #PA1-28595) was added to the samples, at 1:300 concentration, for two hours at room  
200 temperature with shaking. The secondary antibody was removed and cells were washed with 1X  
201 PBS 3 times for 5 minutes per wash. Vectashield antifade (Vector Labs) mounting medium with  
202 DAPI (H-1200) was added to the coverslips. The coverslips were placed on microscope slides,  
203 and the edges were sealed. The images were obtained using a fluorescent microscope.

## 204 Mathematical modeling

### 205 Development of the spatial stochastic model of the circadian clock

206  
207 We extended the previous mathematical model of the mammalian circadian clock (10-14) to  
208 generate the spatial stochastic model (Fig. 3A) by using the agent-based modelling approach (15).  
209 Agent-based model is a class of computational models for simulating the actions of autonomous  
210 cellular components, which are called agents. Our model consists of four agents: *Per* mRNA,  
211 hypophosphorylated PER, hyperphosphorylated PER, and obstacles to PER trafficking. The  
212 agents follow specific rules about how they act and move (see Table 1 for details). In the model,  
213 *Per* mRNA is transcribed in the nucleus and then randomly moves. When *Per* mRNA reaches the  
214 cytoplasm, it is translated to PER protein. Then, PER protein transits toward the perinucleus by  
215 cytoplasmic flux and accumulates there (Fig 3A, (i)); this movement can be disrupted by the  
216 obstacles (Fig. 3A, (ii)). If the accumulated PER is hyperphosphorylated (Fig. 3A (iii)), it is  
217 translocated into the nucleus and inhibits its own transcriptional activator (Fig. 3A (iv)). See  
218 below for a detailed description of how the biochemical activity and the mobility of agents were  
219 simulated.  
220

### 221 Simulation

222 All the simulations were performed using an open-source agent-based modelling software,  
223 NetLogo 6.0.4 (Center for Connected Learning and Computer-Based Modeling, Northwestern  
224 University, Evanston, IL) (16) and MATHEMATICA 11.0 (Wolfram Research Champaign, IL)  
225 with an Intel® Core™ i7-6700CPU 3.40 GHz computer hardware.  
226

### 227 Size of cell, nucleus and agents in the model

228 For simplicity, we modelled the cell two-dimensionally, as a circle with unitless radius of  $d$  (fig.  
229 S10A). Then, the radius of nucleus was defined as  $d/3$  so that the nucleus occupies about 10% of  
230 the cell area, consistent with the experimental data (17). The perinucleus (Fig. 3A, pink region  
231 and fig. S7A and B, red region) was defined as the annulus region around the nucleus whose area  
232 occupies about 15% of the cytoplasmic area. The inner periphery of the cytoplasm fig. S7A and  
233 B, green region) was defined as the annulus region around the perinuclear region whose area  
234 occupies about 20% of the cytoplasmic area. Each cytoplasmic obstacle was defined as a small  
235 circle with radius of  $d/50$ . Each PER molecule was modelled as a circle with radius of  $d/100$ ,  
236 which facilitates modelling of their nuclear import and export (see Mobility of agent section  
237 below and fig. S10B-F for details).  
238  
239

### 240 Simulation of biochemical reactions

241 The biochemical reactions of an individual agent were simulated with a Markov chain scheme  
242 (18, 19). If an individual agent  $x$  is involved in  $N$  reactions ( $i=1, \dots, N$ ), then the number that the

243  $i$ th reaction involving  $x$  occurs during  $[t, t + \Delta t]$ ,  $N_i^x(t)$ , follows a Poisson distribution:  
 244  $N_i^x(t) \sim \text{Pois}(p_i^x(t))$ , where  $p_i^x(t)$  is the probability that the  $i$ th reaction involving  $x$  occurs during  
 245  $[t, t + \Delta t]$  (20-22). Thus, the probability that at least one reaction involving  $x$  occurs during  $[t, t +$   
 246  $\Delta t]$  becomes  $1 - \exp(-\sum_{i=1}^N p_i^x(t))$  (20-22), which determines whether at least one reaction involving  
 247  $x$  occurs for  $[t, t + \Delta t]$  or not.  $\Delta t$  was chosen small enough so that the probability that the multiple  
 248 reactions involving  $x$  occur for  $[t, t + \Delta t]$  could be neglected (23, 24). Thus, we assumed that each  
 249 individual agent engages in at most one reaction for  $[t, t + \Delta t]$ .

250  
 251 *Step 1. Decide whether an individual agent engages in a biochemical reaction or not for  $[t, t + \Delta t]$ .*

252 1) Calculate the probability that a reaction involving  $x$  occurs for  $[t, t + \Delta t]$ :

$$253 \quad 1 - \exp\left(-\sum_{i=1}^N p_i^x(t)\right).$$

254 2) Get a uniform random number  $u \in [0,1]$ .

255 3) If  $u \leq 1 - \exp\left(-\sum_{i=1}^N p_i^x(t)\right)$ , a reaction involving  $x$  occurs for  $[t, t + \Delta t]$ . Otherwise,  
 256  $x$  does not.

257  
 258 *Step 2. If a reaction involving  $x$  occurs, decide which reaction occurs for  $[t, t + \Delta t]$ .*

259 1) Calculate the cumulative function  $R_j(t) = \sum_{i=1}^j p_i^x(t)$  for  $j = 1, \dots, N$ .

260 2) Get a uniform random number  $v \in [0,1]$ .

261 3) Identify the reaction to carry out for  $x$  by finding the  $i$  for which  $\frac{R_{i-1}(t)}{R_N(t)} < v \leq \frac{R_i(t)}{R_N(t)}$

262 4) Change the state of  $x$  by carrying out the  $i$ th reaction.

263  
 264 By repeating this scheme for all agents, the state of agents is updated.

265 The probability that each reaction occurs for  $\Delta t$  was obtained by adjusting the parameter  
 266 values of the previous mathematical model of the mammalian circadian clock (10-13) (Table 2).  
 267 The hyperphosphorylated PER is set to be more likely degraded than the hypophosphorylated  
 268 PER (10, 25-27). In Fig. 4C and D, the probability that *Per* mRNA is transcribed for  $\Delta t$  was  
 269 doubled to capture the strong *Per* mRNA rhythmicity even in absence of the bistability in PER  
 270 hyperphosphorylation. In Fig 5E, the probability that *Per* mRNA is transcribed for  $\Delta t$  was  
 271 increased by 50% to restore the PER rhythmicity in the adipocytes.

272 *Per* mRNA transcription and the multisite phosphorylation of PER protein involve fast  
 273 binding and unbinding reactions, which dramatically increases computation cost. Thus, we  
 274 eliminated fast reactions and derived reaction probabilities for slow reactions by using a total  
 275 quasi-steady state approximation (tQSSA) (28, 29) as described below. This dramatically reduces  
 276 the computation cost but accurately approximates the original stochastic simulation (12, 30-32).

### 277 *Modelling of Per mRNA transcription and PER protein translation*

278 In the model, the transcription of *Per* mRNA is proportional to the number of free activators not  
 279 sequestered by PER protein. To calculate the number of free activators at each time, we first  
 280 derived the quasi-steady state of fraction of free activator,  $f(P, A, K_d)$ , by using tQSSA under the  
 281 assumption of fast binding and unbinding between PER protein and the activator (10-14):  
 282

$$283 \quad f(P, A, K_d) = \frac{A - P - K_d + \sqrt{(A - P - K_d)^2 + 4 \cdot A \cdot K_d}}{2A}$$

284  
 285 where  $P$ ,  $A$  and  $K_d$  denote the nuclear concentration of PER protein, that of activator and the  
 286 dissociation constant between them.

287  
 288  $f(P, A, K_d)$  was obtained from a reaction-limited system where the reactions of agents are  
 289 slower than their movement (i.e. ODE system) (33). Thus, to use  $f(P, A, K_d)$  in our spatial model,

we divided the nucleus into small regions,  $\mathcal{R}_i$  for  $i = 1, \dots, 16$  (fig. S10A) and obtained the reaction-limited system:

$$\begin{aligned} \mathcal{R}_1 &= \left\{ (r, \theta) \mid 0 \leq r < \frac{r_n}{2}, 0 \leq \theta < \frac{\pi}{4} \right\} \\ \mathcal{R}_i &= \left\{ (r, \theta) \mid 0 < r < \frac{r_n}{2}, \frac{\pi}{4} \cdot (i-1) \leq \theta < \frac{\pi}{4} \cdot i \right\} \text{ for } i = 2, \dots, 8 \\ \mathcal{R}_j &= \left\{ (r, \theta) \mid \frac{r_n}{2} \leq r \leq r_n, \frac{\pi}{4} \cdot (i-9) \leq \theta < \frac{\pi}{4} \cdot (i-8) \right\} \text{ for } j = 9, \dots, 16 \end{aligned}$$

where  $r_n$  denotes the nuclear radius. Then, by multiplying the total number of activators in  $\mathcal{R}_i$ ,  $N_{\mathcal{R}_i}^t$ , by  $f(P_{\mathcal{R}_i}(t), A, K_d)$  where  $P_{\mathcal{R}_i}(t)$  is the concentration of PER in  $\mathcal{R}_i$  at  $t$ , the number of free activators in  $\mathcal{R}_i$  at time  $t$ ,  $N_{\mathcal{R}_i}^f(t)$ , was calculated (i.e.  $N_{\mathcal{R}_i}^f(t) = N_{\mathcal{R}_i}^t f(P_{\mathcal{R}_i}(t), A, K_d)$ ). Note that as we assumed that a fixed number of activators are uniformly distributed in the nucleus,  $N_{\mathcal{R}_i}^t$  is constant. Then, each of  $N_{\mathcal{R}_i}^f(t)$  free activators can promote the *Per* transcription with the probability  $p_{a_1}$  at randomly chosen positions in  $\mathcal{R}_i$  for  $[t, t + \Delta t]$ .

The transcribed mRNA is translated in the outside of the inner periphery of the cytoplasm (fig. S7A and B, blue region) as ribosomes are expected to be largely distributed there (34-36), and ribosomes near the nucleus are sequestered to the rough endoplasmic reticulum (37).

### Modelling of the multisite phosphorylation of PER protein

We derived the reaction probabilities for hyperphosphorylation and dephosphorylation for  $\Delta t$  by using the tQSSA (28, 29). Specifically, the multisite phosphorylation (Fig. 3B) consists of reactions among PER, CK1 $\delta/\epsilon$  and PP1 as follows:

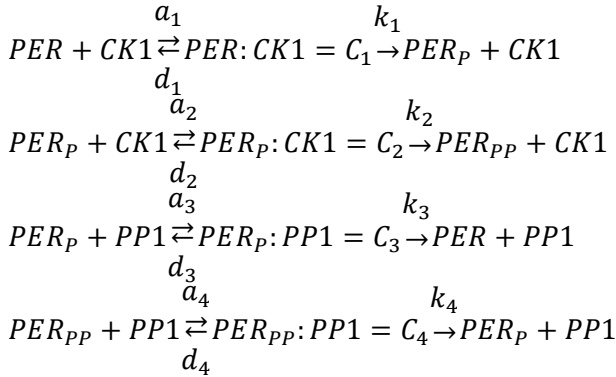

where *PER*, *PER<sub>p</sub>*, *PER<sub>pp</sub>*, *CK1* and *PP1* are non-, prime- and hyperphosphorylated PER, CK1 $\delta/\epsilon$  and PP1, respectively, and  $C_i$  for  $i = 1, 2, 3$  and 4 are the intermediate complexes.

These reactions can be described with the ODE system based on mass action kinetics:

$$\begin{aligned} \frac{d[\text{PER}]}{dt} &= -a_1[\text{PER}] \cdot [\text{CK1}] + d_1[C_1] + k_3[C_3], \\ \frac{d[\text{PER}_p]}{dt} &= k_1[C_1] - a_2[\text{PER}_p] \cdot [\text{CK1}] + d_2[C_2] - a_3[\text{PER}_p] \cdot [\text{PP1}] + d_3[C_3] + k_4[C_4], \\ \frac{d[\text{PER}_{pp}]}{dt} &= k_2[C_2] - a_4[\text{PER}_{pp}] \cdot [\text{PP1}] + d_4[C_4], \\ \frac{d[C_1]}{dt} &= a_1[\text{PER}] \cdot [\text{CK1}] - (d_1 + k_1)[C_1], \\ \frac{d[C_2]}{dt} &= a_2[\text{PER}_p] \cdot [\text{CK1}] - (d_2 + k_2)[C_2], & \dots \text{ (Eq. 1)} \\ \frac{d[C_3]}{dt} &= a_3[\text{PER}_p] \cdot [\text{PP1}] - (d_3 + k_3)[C_3], \\ \frac{d[C_4]}{dt} &= a_4[\text{PER}_{pp}] \cdot [\text{PP1}] - (d_4 + k_4)[C_4], \\ \text{PER}_{tot} &= [\text{PER}] + [\text{PER}_p] + [\text{PER}_{pp}] + [C_1] + [C_2] + [C_3] + [C_4], \\ \text{CK1}_{tot} &= [\text{CK1}] + [C_1] + [C_2], \end{aligned}$$

$$PP1_{tot} = [PP1] + [C_3] + [C_4].$$

The values of  $a_i$ ,  $d_i$  and  $k_i$  for  $i = 1, 2, 3$  and  $4$ , were modified from (Table 3). In particular,  $k_1 \ll k_2$  to capture the cooperativity in multisite PER phosphorylation (38). This cooperativity was eliminated in Fig. 4C and D (i.e.  $k_1 = k_2$ ) to disrupt the bistability (Table 3). To reduce this system with tQSSA, we have replaced  $PER$  and  $PER_{pp}$  with slower variables  $\overline{NP} \equiv PER + PER_p + C_1 + C_2 + C_3$  and  $\overline{HP} \equiv PER_{pp} + C_4$ , which represent the concentrations of hypo- and hyperphosphorylated PER, respectively. Compared to  $\overline{NP}$  and  $\overline{HP}$ , which do not engage in fast binding and unbinding reactions ( $a_i$  and  $d_i$ ),  $PER_p$ ,  $C_1$ ,  $C_2$ ,  $C_3$  and  $C_4$  more rapidly reach their quasi-steady states (QSSs). These can be derived by solving  $\frac{d[PER_p]}{dt} = 0$  and  $\frac{d[C_i]}{dt} = 0$  for  $i = 1, 2, 3$  and  $4$  in terms of  $\overline{NP}$  and  $\overline{HP}$ . By substituting these QSSs, we can get the reduced system, which solely depends on  $\overline{NP}$  and  $\overline{HP}$ :

$$\begin{aligned} \frac{d[\overline{NP}]}{dt} &= -k_2 C_2([\overline{NP}], [\overline{HP}]) + k_4 C_4([\overline{NP}], [\overline{HP}]), \\ \frac{d[\overline{HP}]}{dt} &= k_2 C_2([\overline{NP}], [\overline{HP}]) - k_4 C_4([\overline{NP}], [\overline{HP}]), \\ PER_{tot} &= [\overline{NP}] + [\overline{HP}]. \end{aligned} \quad \dots \text{ (Eq. 2)}$$

$k_2 C_2([\overline{NP}], [\overline{HP}])$  and  $k_4 C_4([\overline{NP}], [\overline{HP}])$  describe the reaction rates for hyperphosphorylation and dephosphorylation of PER, respectively, in the reaction-limited ODE system. Thus, we can obtain the reaction probabilities for hyperphosphorylation and dephosphorylation of each individual PER molecule  $x$  with  $\frac{k_2 C_2([\overline{NP}]_{x,t}, [\overline{HP}]_{x,t})}{[\overline{NP}]_{x,t}}$  and  $\frac{k_4 C_4([\overline{NP}]_{x,t}, [\overline{HP}]_{x,t})}{[\overline{HP}]_{x,t}}$ , where  $[\overline{NP}]_{x,t}$  and  $[\overline{HP}]_{x,t}$  are “local” concentrations of hypo- and hyperphosphorylated PER near the molecule  $x$  at time  $t$ :

$$\begin{aligned} [\overline{NP}]_{x,t} &= \frac{1}{\Omega_L} |\{\text{Hypophosphorylated PER} \in R_t(x, 4 \cdot r_a)\}| \\ [\overline{HP}]_{x,t} &= \frac{1}{\Omega_L} |\{\text{Hyperphosphorylated PER} \in R_t(x, 4 \cdot r_a)\}| \end{aligned}$$

where  $r_a$ ,  $R_t(x, 4 \cdot r_a)$  and  $\Omega_L$  denote the radius of agent, the circular local area centered at  $x$  with radius of  $4 \cdot r_a$  at  $t$  and its volume, respectively. Note that  $\Omega_L = 0.0064 \cdot \Omega$  where  $\Omega$  is the area of the cell with radius of  $d$ ; fig. S10A). As  $C_2([\overline{NP}], [\overline{HP}])$  and  $C_4([\overline{NP}], [\overline{HP}])$  in the Eq. 2 do not have an explicit function form, they were numerically calculated and saved. Then, they are recalled and used when the simulation is performed.

When an individual hypophosphorylated PER is hyperphosphorylated and imported to the nucleus, it is kept hyperphosphorylated, consistent with the experimental data (3, 14).

### Mobility of agent

Each individual agent moves for  $[t, t + \Delta t]$  as follows:

#### *Step 1. Update the position of an individual agent.*

Let  $posi(t)$  be the position of an individual agent at time  $t$ . The position is changed by adding it and the movement function of the agent,  $U(t)$ , for each time step  $\Delta t$ :

$$posi(t + \Delta t) = posi(t) + U(t).$$

1) *Per* mRNA, nuclear PER protein and cytoplasmic obstacle were modelled to move following the two-dimensional random walk (fig. S10B (i)):

$$U(t) = \begin{cases} D_p \cdot (\cos X(t), \sin X(t)) & \text{for Per mRNA and nuclear PER protein} \\ D_o \cdot (\cos X(t), \sin X(t)) & \text{for obstacle} \end{cases}$$



where  $D_p$  and  $D_o$  denote the movement step size of *Per* mRNA and PER protein and that of an obstacle, respectively (Table 2).  $X(t)$  is a uniform random variable on  $[0, 2\pi]$ .

- 2) Cytoplasmic PER protein was modelled to transit toward the perinucleus by cytoplasmic flux: it heads to the nucleus with probability  $p_{advec}$  (fig. S10B, green arrow in (ii)) and randomly moves with probability  $1 - p_{advec}$  (fig. S10B, black arrow in (ii)). In other words,

$$U(t) = \begin{cases} D_p \cdot (\cos h(t), \sin h(t)) & \text{if } X_1(t) \leq p_{advec} \\ D_p \cdot (\cos X_2(t), \sin X_2(t)) & \text{otherwise} \end{cases}$$

where  $X_1(t)$  and  $X_2(t)$  are uniform random variables on  $[0, 1]$  and on  $[0, 2\pi]$ , respectively;  $h(t)$  is the polar coordinate angle of the vector heading from the position of PER protein to the center of cell. When the flux is disrupted by the obstacles, PER protein randomly moves with

$$U(t) = \frac{D_p}{2} \cdot (\cos X(t), \sin X(t))$$

(fig. S10B, red arrow in (ii)). We assumed that the movement of *Per* mRNA is not affected by the obstacles to purely focus on the movement of PER protein.

*Step 2. After the position update, calculate the distance of the agent from the center of the cell,  $d(t + \Delta t)$ , and the angle between the location and direction vectors of the agent,  $\theta(t + \Delta t)$  (see fig. S10C-F).*

*Step 3. If the agent overlaps with the cell membrane, adjust its position to keep it in the cytoplasm. Specifically, if  $|d(t + \Delta t) - r_c| < r_a$  where  $r_c$  and  $r_a$  denote the radius of cell and that of agent, respectively,  $posi(t + \Delta t)$  is adjusted to the new position inside the cytoplasmic membrane (fig. S10C).*

*Step 4. If the agent overlaps with the nuclear membrane, adjust its position as follows.*

- 1) If *Per* mRNA, hypophosphorylated PER and obstacle overlap with the nuclear membrane (i.e.  $|d(t + \Delta t) - r_n| < r_a$ ),  $posi(t + \Delta t)$  is adjusted to the outside of the nuclear membrane (fig. S10D) except for when *Per* mRNA first exists the nucleus.
- 2) If hyperphosphorylated PER overlaps with the nuclear membrane (i.e.  $|d(t + \Delta t) - r_n| < r_a$ ) and heads to the nucleus (i.e.  $|Mod(2\pi - \theta(t + \Delta t), 2\pi) - \pi| < \frac{\pi}{2}$ ), it is imported to the nucleus with a probability of  $p_{im}$  (fig. S10E).
- 3) If hyperphosphorylated PER overlaps with the nuclear membrane (i.e.  $|d(t + \Delta t) - r_n| < r_a$ ) and heads to the cytoplasm (i.e.  $|Mod(2\pi - \theta(t + \Delta t), 2\pi) - \pi| \geq \frac{\pi}{2}$ ),  $posi(t + \Delta t)$  is adjusted to the inside of nucleus (fig S10F).

By repeating this scheme for all agents, their position is kept updated.

Quantitative understanding for PER trafficking is far from complete. For instance, the trafficking speed of PER mRNA has not been reported. Even the measured trafficking speed of PER protein differs more than ~100-fold across studies (39, 40). Thus, for simplicity, we assumed that *Per* mRNA and PER protein have the same movement speed,  $D_p$ , and the values of  $D_p$  and  $p_{advec}$  (Table 2) were set to make the model simulate rhythmic PER expression (Fig. 3E). Note that the simulation results are robust to the choice of these values. For instance, the perturbation of  $D_p$  by 50% leads to the perturbation of period by only ~8%. The value of  $D_o$  was set to be

425 smaller than that of  $D_p$  (Table 2) as the obstacle is a heavy macromolecule, which is expected to  
426 move slowly.

#### 427 Time-scale in the model

429 The model, which is considered to a normal cell (Fig. 3D and E), simulated one cycle of PER  
430 rhythm for  $3794 \cdot \Delta t$  on average. Based on this, we defined  $3794 \cdot \Delta t$  as 24 hr (i.e.  $\Delta t = 0.006$  hr) and  
431 used the definition to calculate the simulation time in Fig 3E, G and H and Fig 4I and Fig S7.

#### 432 Statistics

433 In this study, asterisks indicate significant p-values as follows: \*,  $p < 0.05$ ; \*\*,  $p < 0.01$ ; \*\*\*,  
434  $p < 0.001$ . Data across multiple experiments are shown as  $\text{mean} \pm \text{SEM}$ . Student's t-test was used in  
435 Fig. 1D and E. Two-way ANOVA and Bonferroni post-hoc tests were used for Fig. 1A. One-way  
436 ANOVA and Bonferroni post-hoc tests were used in Fig. 1B, fig. S1 and Fig. 3J. Leven's test was  
437 used in Fig. 5D to compare the variances of period between two groups. JTK\_CYCLE (41) was  
438 used in Fig. 5F to assess the rhythmicity. Note that if the estimated p-value by JTK\_CYCLE is  
439 less than 0.05, the signal was deemed to be rhythmic.  
440  
441  
442

443  
444  
445

**Table 1. Model rules.**

| No. | Rule definition                                                                                                                                      |
|-----|------------------------------------------------------------------------------------------------------------------------------------------------------|
| 1   | An individual <i>Per</i> mRNA is produced in the nucleus with a probability of $p_{a_1}$ for each time step                                          |
| 2   | An individual <i>Per</i> mRNA is translated with a probability of $p_{a_2}$ for each time step when it reaches the outer periphery of the cytoplasm. |
| 3   | An individual <i>Per</i> mRNA is degraded with a probability of $p_{d_1}$ for each time step.                                                        |
| 4   | An individual hypophosphorylated PER is hyperphosphorylated with a probability of $p_{HP}$ for each time step.                                       |
| 5   | An individual hypophosphorylated PER is degraded with a probability of $p_{d_2}$ for each time step.                                                 |
| 6   | An individual hyperphosphorylated PER is dephosphorylated with a probability of $p_{NP}$ for each time step                                          |
| 7   | An individual hyperphosphorylated PER is degraded with a probability of $p_{d_3}$ for each time step.                                                |
| 8   | An individual agent moves following its movement scheme for each time step (see supplementary materials for details).                                |

446

447

448

449

450

**Table 2. Parameters of the spatial stochastic model.** Here,  $\Delta t = 0.006$  hr, and  $\Omega$  is the area of the cell with radius of  $d$  (Fig S12A).

| Parameter description                                                                               | Symbol      | Value                               |
|-----------------------------------------------------------------------------------------------------|-------------|-------------------------------------|
| Reaction probability for <i>Per</i> mRNA production for $\Delta t$                                  | $p_{a_1}$   | 0.015 (1/ $\Delta t$ )              |
| Reaction probability for PER protein translation for $\Delta t$                                     | $p_{a_2}$   | 0.005 (1/ $\Delta t$ )              |
| Reaction probability for <i>Per</i> mRNA degradation for $\Delta t$                                 | $p_{d_1}$   | 0.001 (1/ $\Delta t$ )              |
| Reaction probability for hypophosphorylated PER degradation for $\Delta t$                          | $p_{d_2}$   | 0.001 (1/ $\Delta t$ )              |
| Reaction probability for hyperphosphorylated PER degradation for $\Delta t$                         | $p_{d_3}$   | 0.002 (1/ $\Delta t$ )              |
| The number of total activators in the nucleus                                                       | $A_{tot}$   | 500                                 |
| Dissociation constant between hyperphosphorylated PER and activator                                 | $K_d$       | $4.68 \cdot 10^{-3}$ (1/ $\Omega$ ) |
| Movement speed of <i>Per</i> mRNA and PER protein for $\Delta t$                                    | $D$         | $0.032d$ (1/ $\Delta t$ )           |
| Movement speed of obstacle for $\Delta t$                                                           | $D_{obs}$   | $0.008d$ (1/ $\Delta t$ )           |
| Probability that PER protein transits toward the nucleus for $\Delta t$                             | $p_{advec}$ | 0.2 (1/ $\Delta t$ )                |
| Probability that hyperphosphorylated PER in the cytoplasm is imported to the nucleus for $\Delta t$ | $p_{im}$    | 0.01 (1/ $\Delta t$ )               |

451

452

453  
454  
455  
456  
457

**Table 3. Parameters of the ODE system describing the multisite phosphorylation mechanism (Eq. 1).** In Fig 4C and D,  $k_1 = k_2 = 0.0625/\Delta t$ . Here,  $\Delta t = 0.006$  hr, and  $\Omega$  is the area of the cell with radius of  $d$  (Fig S12A).

| Parameter description                                                         | Symbol      | Value (unit)                 |
|-------------------------------------------------------------------------------|-------------|------------------------------|
| Binding rate constant for nonphosphorylated PER to CK1 $\epsilon/\delta$      | $a_1$       | 0.0032 ( $\Omega/\Delta t$ ) |
| Binding rate constant for prime-phosphorylated PER to CK1 $\epsilon/\delta$   | $a_2$       | 0.016 ( $\Omega/\Delta t$ )  |
| Binding rate constant for prime-phosphorylated PER to PP1                     | $a_3$       | 0.016 ( $\Omega/\Delta t$ )  |
| Binding rate constant for hyperphosphorylated PER to PP1                      | $a_4$       | 0.0256 ( $\Omega/\Delta t$ ) |
| Unbinding rate constant for nonphosphorylated PER to CK1 $\epsilon/\delta$    | $d_1$       | 10 ( $1/\Delta t$ )          |
| Unbinding rate constant for prime-phosphorylated PER to CK1 $\epsilon/\delta$ | $d_2$       | 5 ( $1/\Delta t$ )           |
| Unbinding rate constant for prime-phosphorylated PER to PP1                   | $d_3$       | 0.5 ( $1/\Delta t$ )         |
| Unbinding rate constant for hyperphosphorylated PER to PP1                    | $d_4$       | 0.5 ( $1/\Delta t$ )         |
| Phosphorylation rate constant for nonphosphorylated PER                       | $k_1$       | 0.011 ( $1/\Delta t$ )       |
| Phosphorylation rate constant for prime-phosphorylated PER                    | $k_2$       | 0.15 ( $1/\Delta t$ )        |
| Dephosphorylation rate constant for prime-phosphorylated PER                  | $k_3$       | 0.1 ( $1/\Delta t$ )         |
| Dephosphorylation rate constant for hyperphosphorylated PER                   | $k_4$       | 0.05 ( $1/\Delta t$ )        |
| Total CK1 $\epsilon/\delta$ concentration                                     | $CK1_{tot}$ | 31250 ( $1/\Omega$ )         |
| Total PP1 concentration                                                       | $PP1_{tot}$ | 7812.5 ( $1/\Omega$ )        |

458  
459  
460

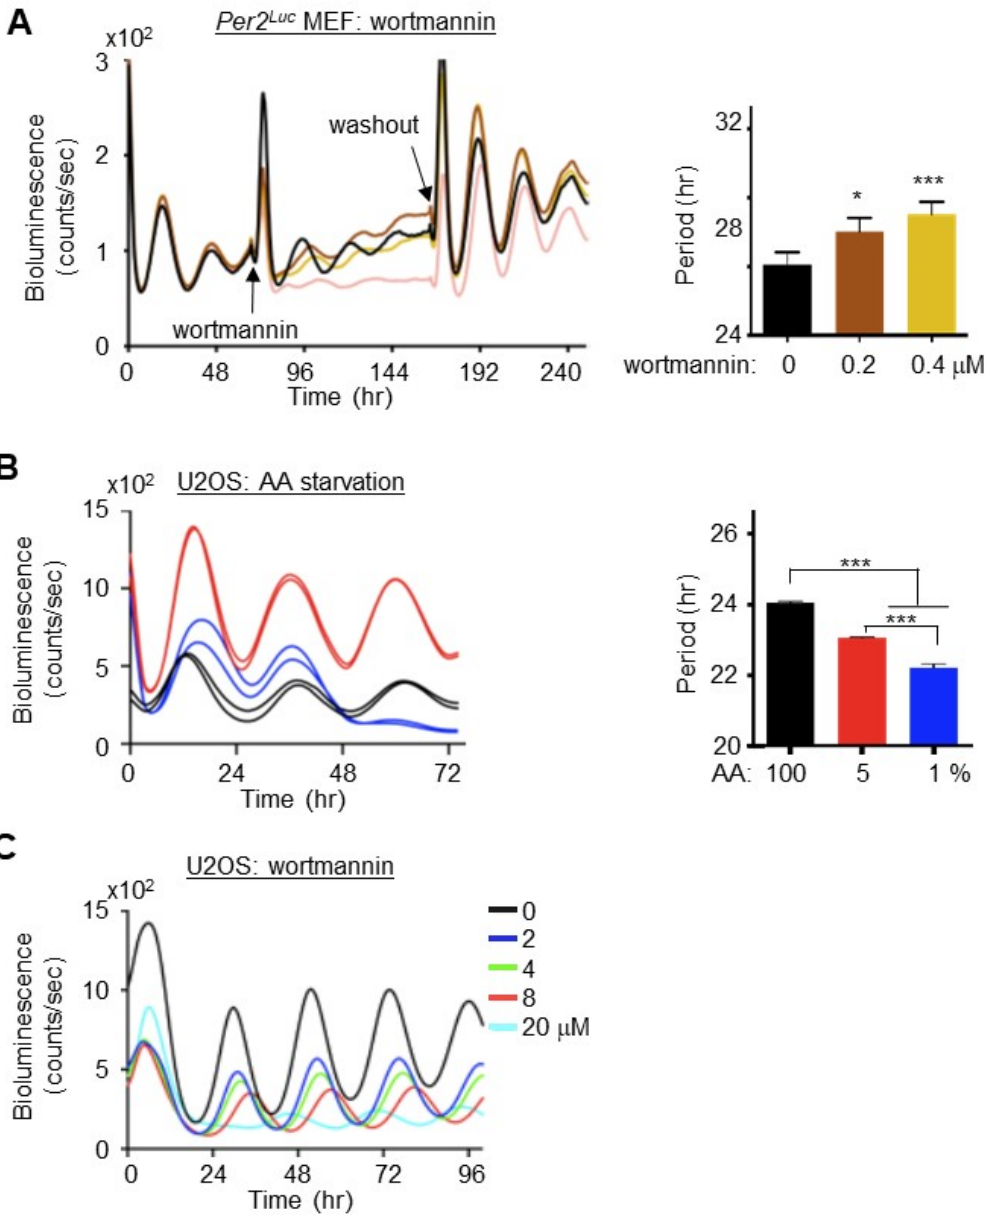

464 **Fig. S1. Modulation of circadian rhythms by different autophagy conditions is conserved in**  
465 **both MEF and U2OS cells. (A)** Circadian rhythms were lengthened by treatment of an  
466 autophagy inhibitor, wortmannin, in MEFs. N=3 each. Representative of two experiments. **(B)**  
467 Circadian rhythms were shortened by starvation in a dose-dependent manner in U2OS cells. N=3  
468 each. Representative of two experiments. **(C)** Circadian rhythms were lengthened by wortmannin  
469 treatment in a dose-dependent manner in U2OS cells. Wortmannin samples included one sample  
470 per concentration. The results are representative of 3 experiments.

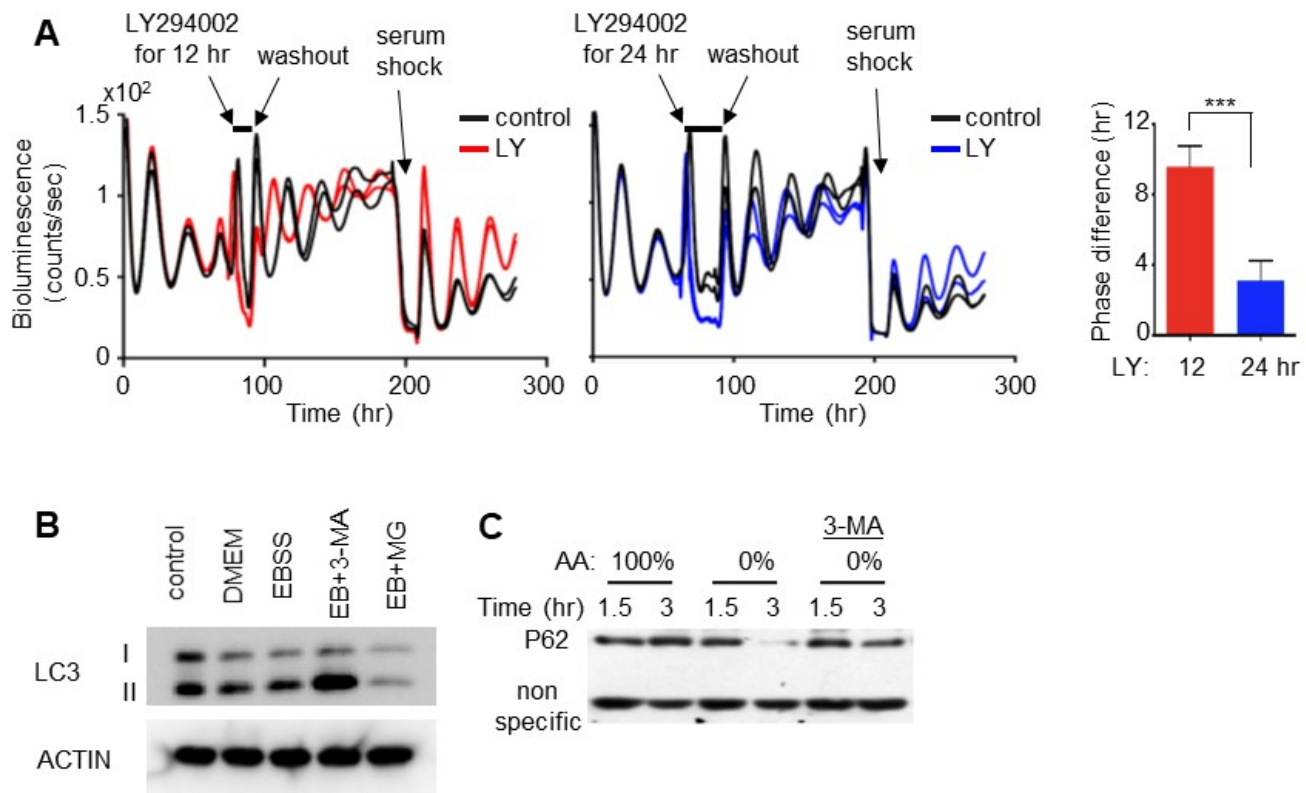

**Fig. S2. Disruption of circadian rhythms by autophagy inhibitors are specific to the circadian clock.** (A) Treatment with autophagy inhibitor LY294002 produced phase-specific effects. When *Per2<sup>Luc</sup>* MEFs were treated with the drug for 12 hr (left) and 24 hr (middle) starting 3 days after the initial serum shock, the phase of the bioluminescence rhythm was dramatically different after the washout while the 2<sup>nd</sup> serum shock produced the same phase regardless of previous phase. N=3 each. Representative of two experiments. (B) 3-MA treatment for 2 hr induced strong accumulation of LC-II indicating that autophagic flux was disrupted while MG132 treatment did not induce accumulation of the autophagy flux indicator. Representative of two experiments. (C) 3-MA treatment inhibited degradation of P62, which is a target of active autophagy. Representative of two experiments.

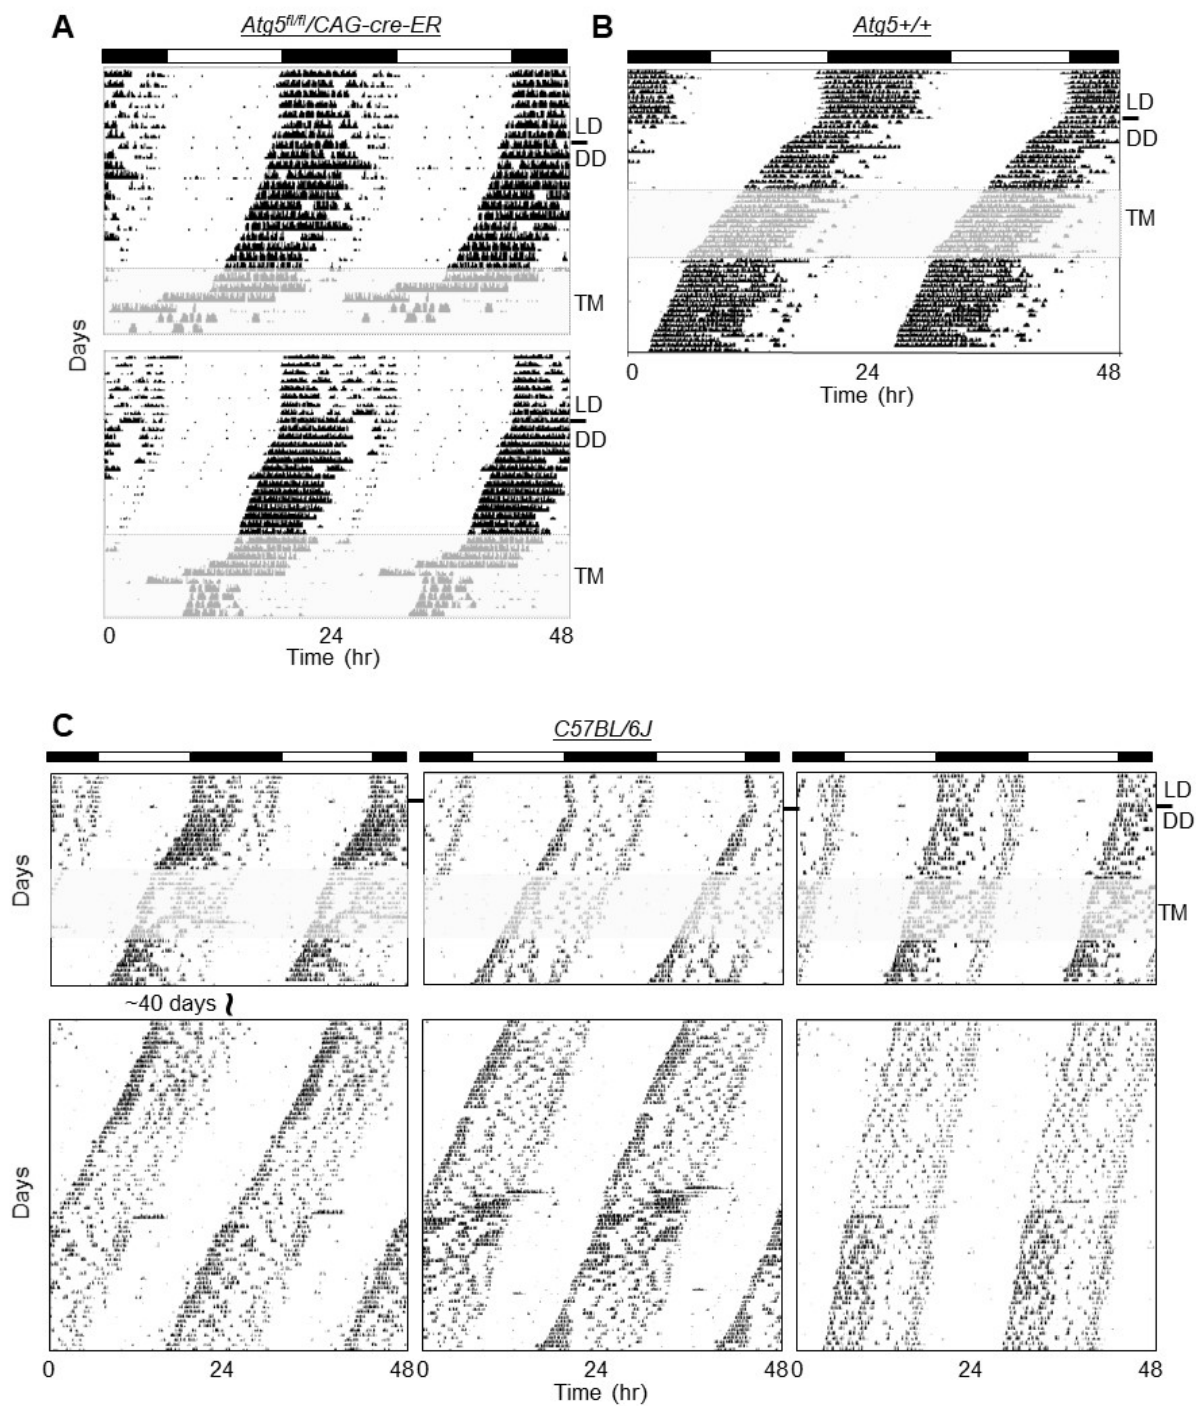

485

486 **Fig. S3. Tamoxifen itself does not produce a circadian phenotype.** (A) *Atg5<sup>fl/fl</sup>; CAG-cre-ER*  
 487 mutant mice died before the end of 2 weeks after treatment with TM to induce *Atg5* deletion, (B)  
 488 while wt mice did not show any health issues or circadian phenotype from TM treatment. (C)  
 489 After initial TM treatment in C57BL/6J mice, behavioral rhythms were measured again ~40 days  
 490 later to demonstrate that TM treatment does not produce a circadian effect in the long term.  
 491

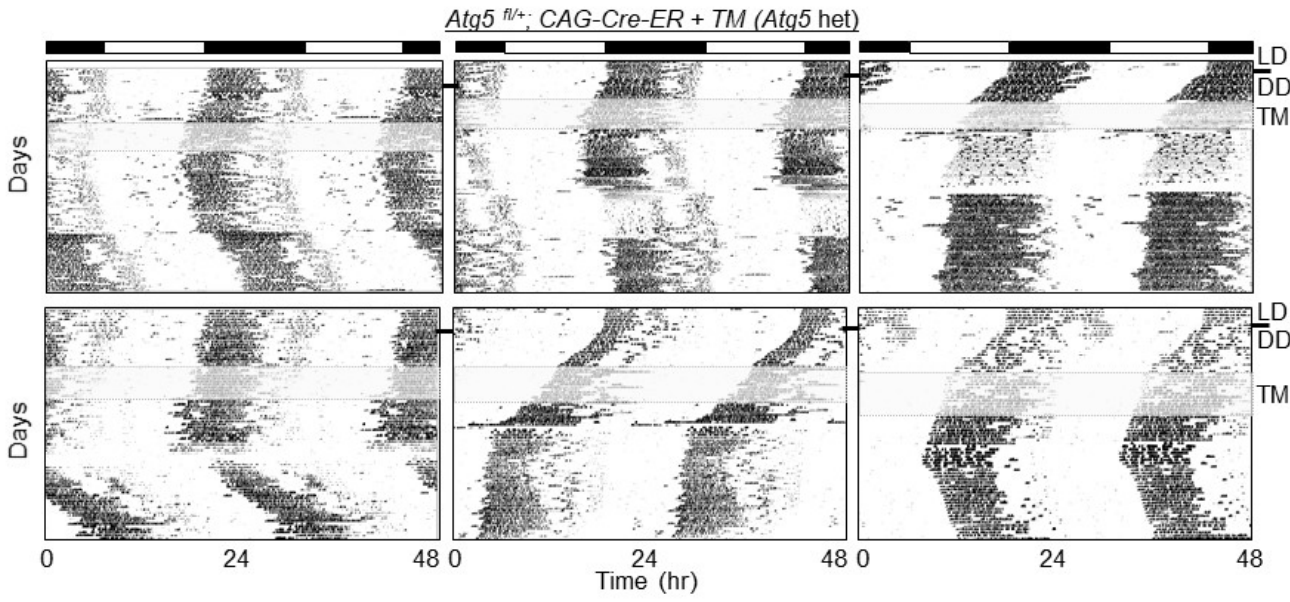

494 **Fig. S4. No two mice show similar wake-sleep cycles.** Six more *Atg5* heterozygotes are shown.  
495 Note that circadian rhythms are very irregular and noisy but generally lengthened.  
496



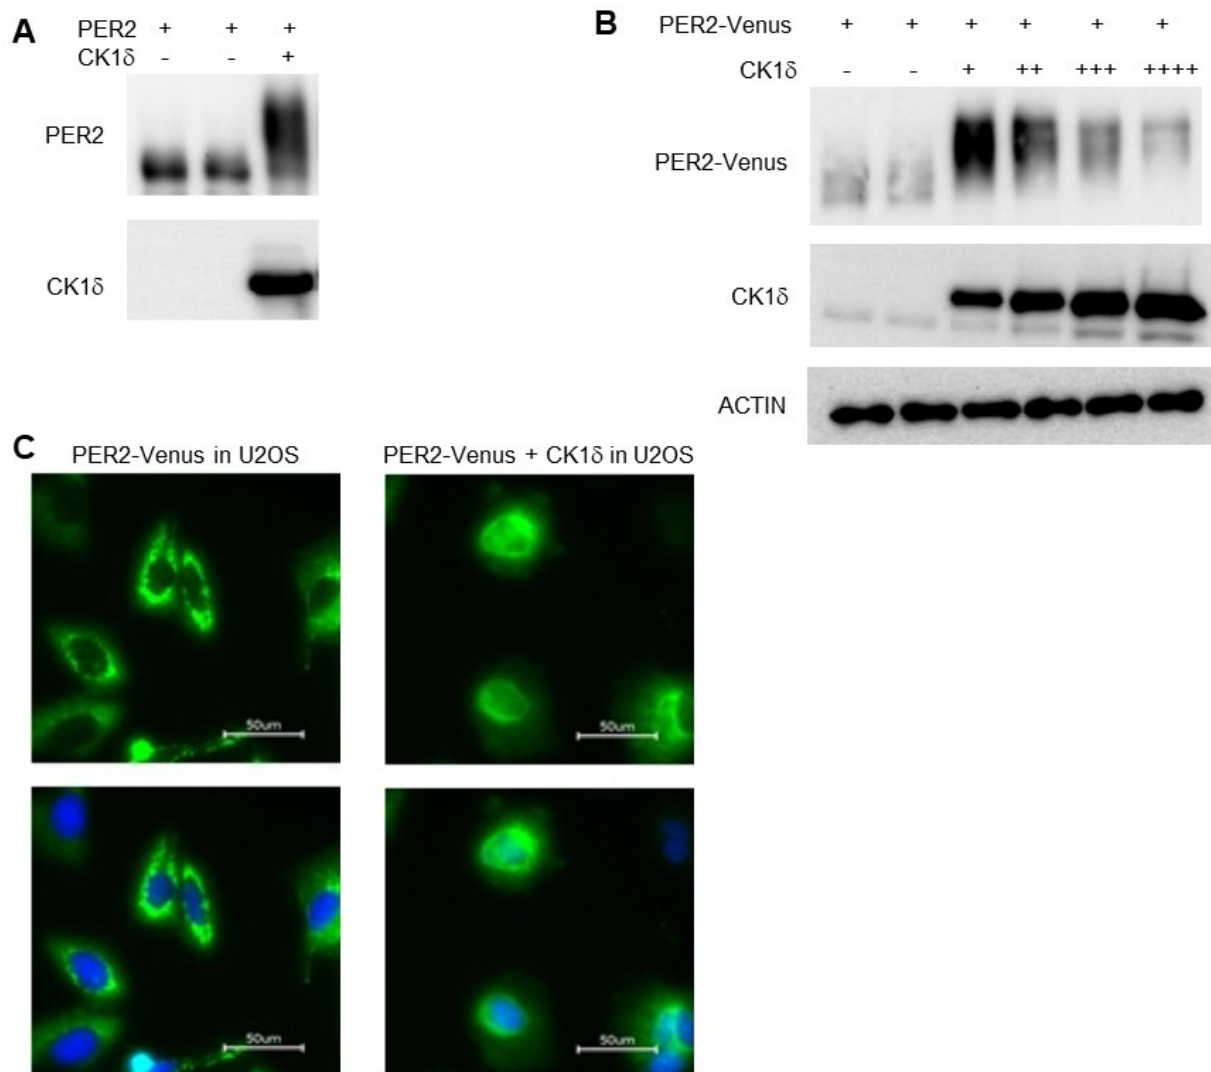

497

498 **Fig. S5. PER2-Venus is regulated by CK1 $\delta$  in the same manner as PER2.** (A) PER2 is  
 499 robustly phosphorylated by CK1 $\delta$ , when co-transfected into 293 cells. (B) PER2-Venus is  
 500 phosphorylated by CK1 $\delta$  as well, and its phosphorylation and stability were CK1 $\delta$  dose-  
 501 dependent. (C) Nuclear accumulation of PER2-Venus depends on CK1 $\delta$ . *Per2-Venus* and *CK1 $\delta$*   
 502 transgenes were co-transfected into U2OS. As in Fig 2H-J, overexpressed PER2-Venus was  
 503 predominantly cytoplasmic but becomes nuclear if enough CK1 $\delta$  was provided because CK1 $\delta/\epsilon$   
 504 are limiting (3). Scale bar = 50  $\mu$ m.  
 505

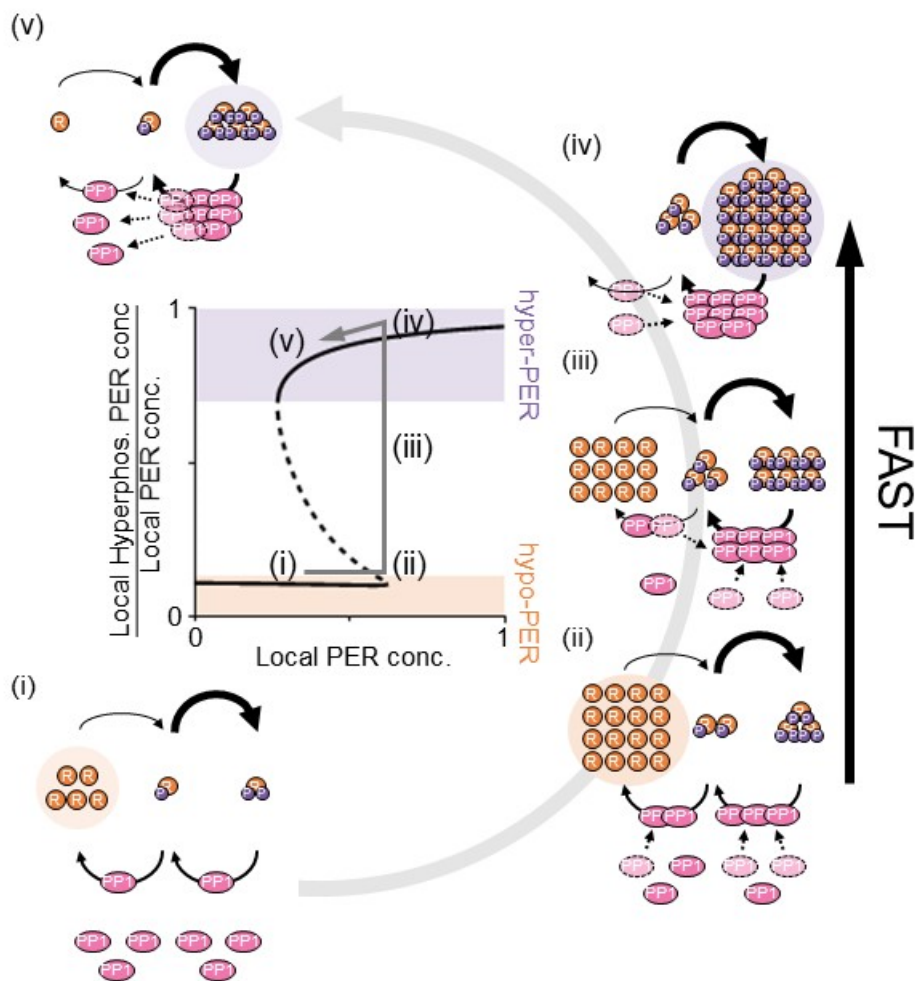

506

507 **Fig. S6. Strong cooperativity in the multisite phosphorylation leads to the bistability in PER**  
 508 **hyperphosphorylation.** (i) When “local” concentration of PER is low, the majority of PER is not  
 509 hyperphosphorylated because PER that is slowly phosphorylated in the priming process (thin  
 510 arrow, hypophosphorylated) is rapidly dephosphorylated by PP1. The faint background circle  
 511 indicates a dominant state of PER. (ii) As concentration of PER increases, the levels of prime-  
 512 phosphorylated PER increase, which allows the prime-phosphorylated PER to be rapidly  
 513 hyperphosphorylated (thick arrow) due to cooperativity (Fig. 3B). The more PER (as PER:CK1)  
 514 is enriched in the perinucleus and hyperphosphorylated, less PP1 is available to the prime-  
 515 phosphorylated PER, resulting in more hyperphosphorylated PER and thus more sequestration of  
 516 PP1 by the hyperphosphorylated PER. Note that the dominant sequestration of PP1 by the  
 517 hyperphosphorylated PER is mainly caused by the stoichiometric difference between hypo- and  
 518 hyper-phosphorylated PER species, not by a difference in their reaction kinetic parameters as the  
 519 catalytic efficiency of PP1 for hypophosphorylated PER is the nearly same as that for  
 520 hyperphosphorylated PER (Table 3) (iii, iv) This positive feedback leads to the sharp increase of  
 521 the hyperphosphorylated PER. (v) The high fraction of hyperphosphorylated PER persists even  
 522 after PER concentration decreases. When the hyperphosphorylated PER is dephosphorylated to  
 523 the prime-phosphorylated PER, the prime-phosphorylated PER is re-hyperphosphorylated rapidly  
 524 (thick arrow) due to the cooperativity (Fig. 3B) and the sequestration of PP1 by  
 525 hyperphosphorylated PER. Such bistability can be augmented or alternatively generated by  
 526 increasing the ratio of  $CK1\delta/\epsilon$  to PP1 in the perinucleus due to stable interaction between  $CK1\delta/\epsilon$   
 527 and PER and homo- and heterodimerization of PER (42-44).  
 528

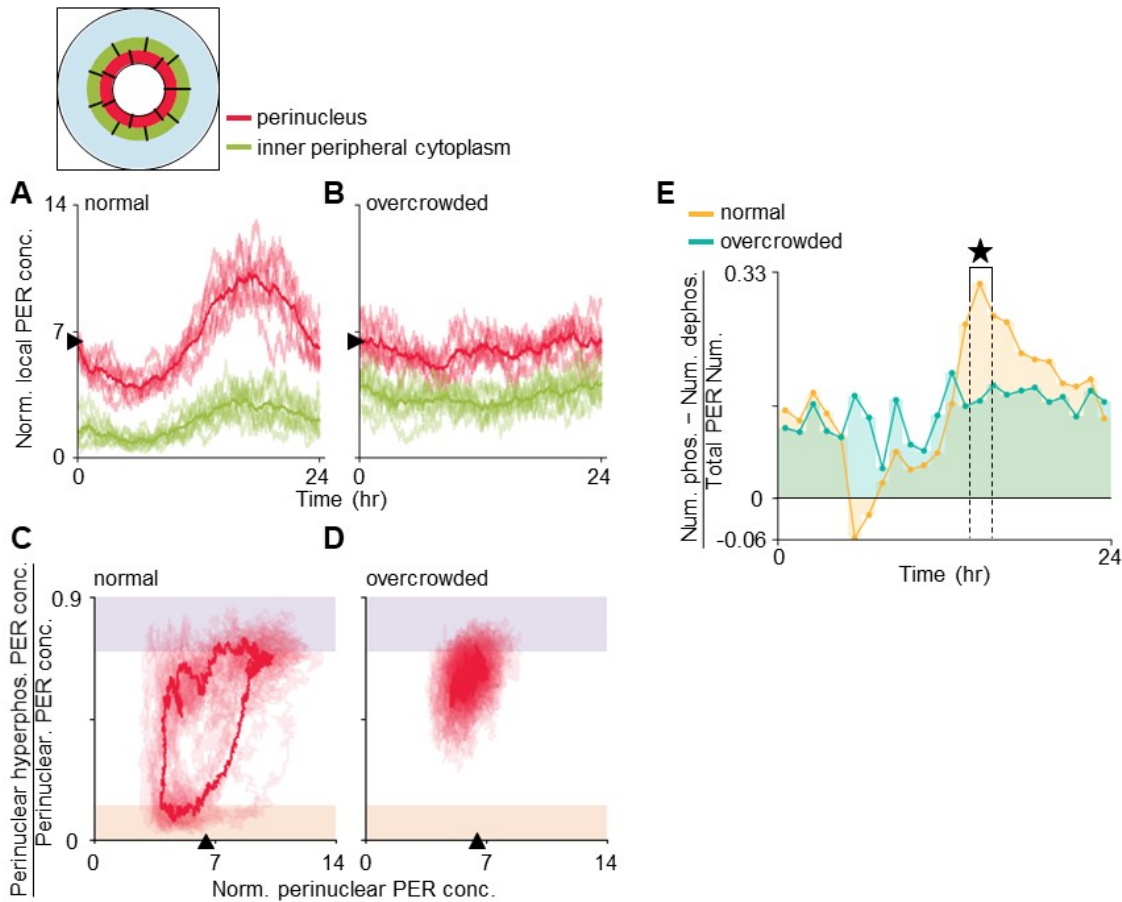

529

**Fig. S7. The bistability is disabled in overcrowded cells. (A-D)** The simulated trajectories of local PER concentration in the perinucleus and the peripheral cytoplasm (A, B) and fraction change of hyperphosphorylated PER in the local area of the perinucleus (C, D). The perinucleus (red region) and the inner peripheral cytoplasm (green region) were divided into 7 and 9 local regions, respectively. Local PER concentration (A-B) and the fraction change of hyperphosphorylated PER (C-D) were calculated from these regions, and their averages were denoted as the solid line. As the number of obstacles increases, the cytoplasmic flux (Fig. 3A (i)) is disrupted and more PER molecules are trapped in the peripheral cytoplasm (A and B; green lines and Fig. 3D and F). The peripheral cytoplasm with high levels of PER provides the perinucleus with hypophosphorylated PER over a longer period (a mild case) or constitutively (a severe case), which maintains the level of perinuclear PER around the bistability threshold (A and B; black triangle). As a result, hyperphosphorylation and nuclear entry occur in a low amplitude and noisy manner (D). PER concentration is normalized by the peak level of total PER in a normal cell as done in Fig. 3C. **(E)** Temporal difference between phosphorylation and dephosphorylation reaction of PER, which is represented by the average total PER concentration for each 1hr bin. With normal cytoplasmic flux, dominant phosphorylation occurs at a specific circadian phase (black star), which leads to the sharp increase of the abundance of hyperphosphorylated PER (Fig. 3E, (ii)). On the other hand, this temporal regulation of phosphorylation is lost in an overcrowded cell, which disables the switch-like phosphorylation (Fig. 3G, (ii)).

550

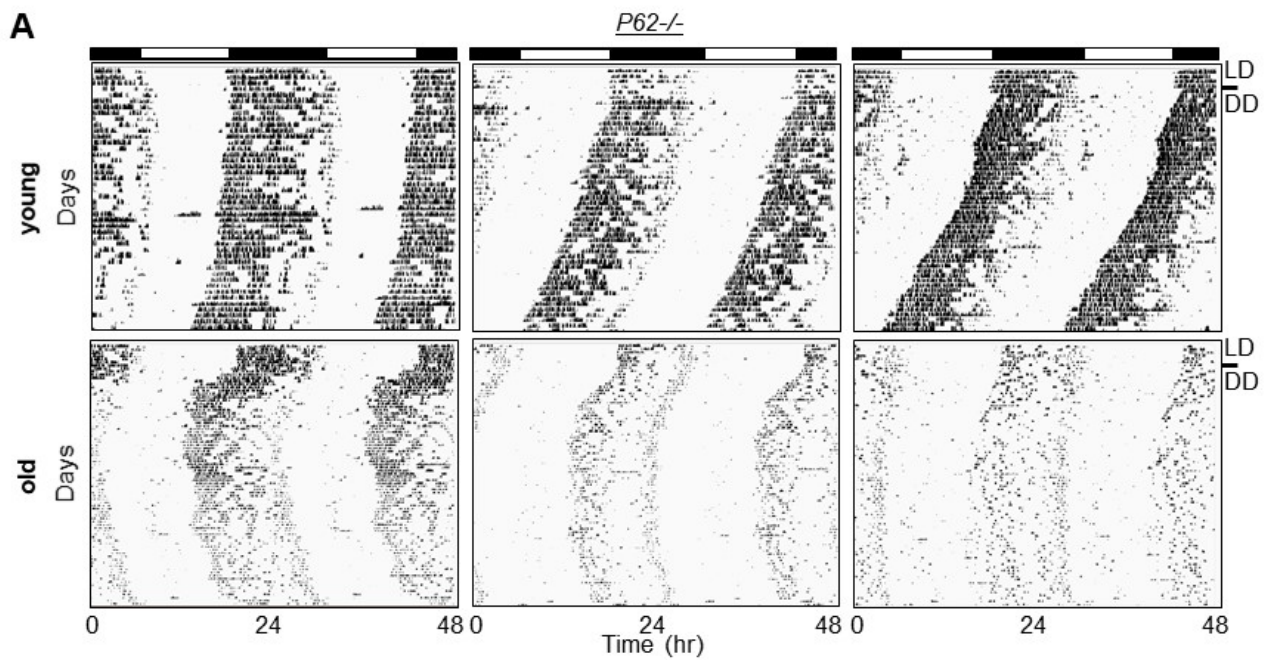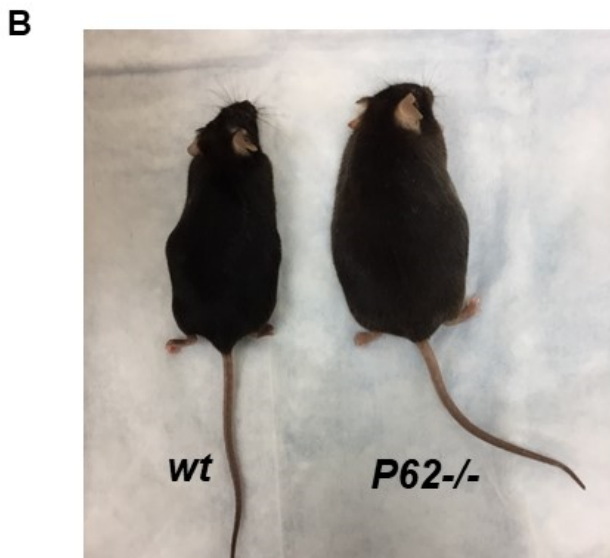

**Fig. S8. Worsening of circadian disruption is associated with aging in *P62* mutant mice.**  
**(A)** *P62* homozygous mutant mice exhibit worsening behavioral rhythms with aging. Top actograms were measured when the mice were ~3 months old while the bottom matching actograms were measured when the same mice were about 8 months old. The actograms in Fig 3I are shown when the mutant mice exhibited unstable rhythms. **(B)** All of the *P62* mutant mice became pronouncedly obese when they were ~10 months old. Age-matched 1-year old wt and *P62* mutant mice are shown.

551

552  
553  
554  
555  
556  
557  
558  
559

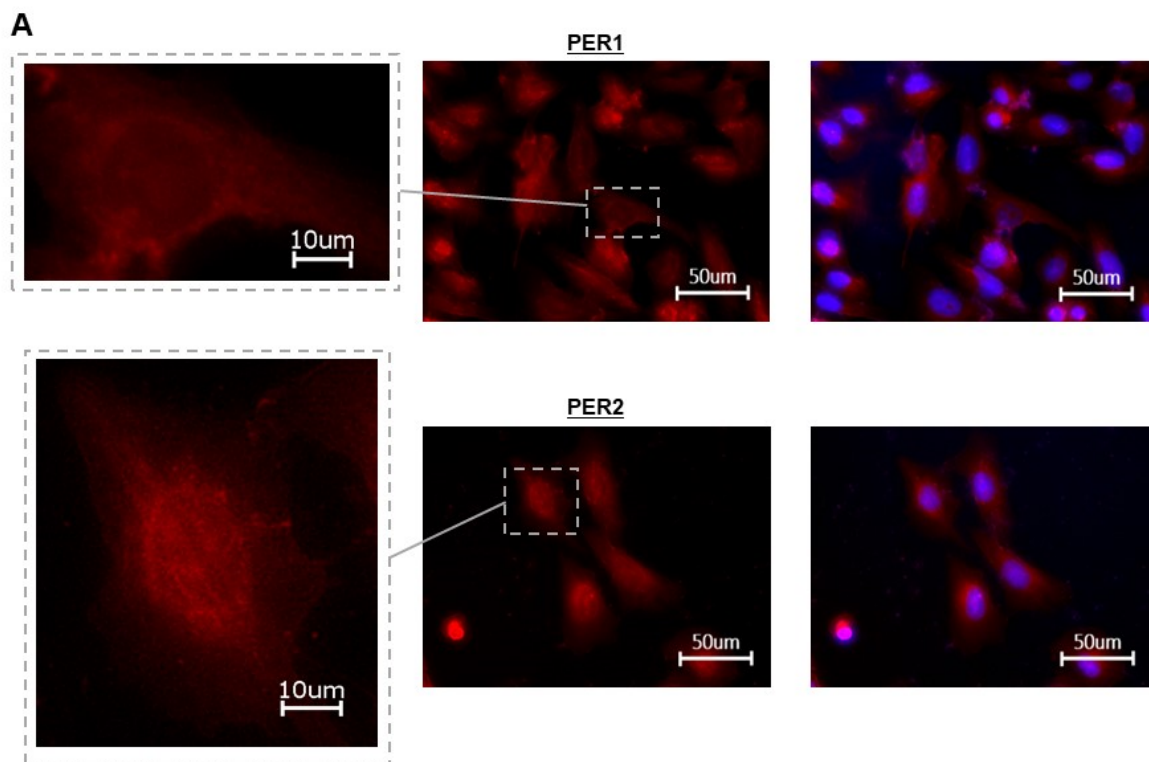

**B**

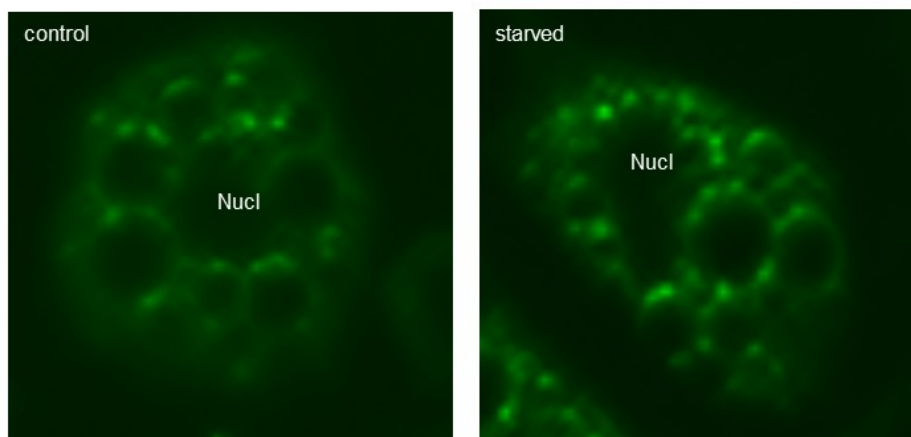

561 **Fig. S9. Spatial regulation of PER is critical for temporal manifestation of PER rhythms.**  
 562 **(A)** Perinuclear ring is observed with endogenous PER1 and PER2. U2OS cells were serum-  
 563 shocked and fixed 36 hours later to capture when PER levels are at their peak, to observe nuclear  
 564 entry of cytoplasmic PER and PER2. Perinuclear rings were observed only in several cells per  
 565 field because rings would not be as prominent as those in transgenic PER2-Venus-expressing  
 566 cells. Representative single cell images are also shown. **(B)** PER2-Venus is constitutively  
 567 predominantly cytoplasmic in adipocytes. The inducible adenoviral vector expressing PER2-  
 568 Venus was introduced into adipocytes. Consistent with the model simulation (Fig. 3F), PER2-  
 569 Venus strongly accumulated in peripheral cytoplasm as well as perinucleus even under starvation  
 570 conditions (5% AA).  
 571

560

561  
562  
563  
564  
565  
566  
567  
568  
569  
570  
571

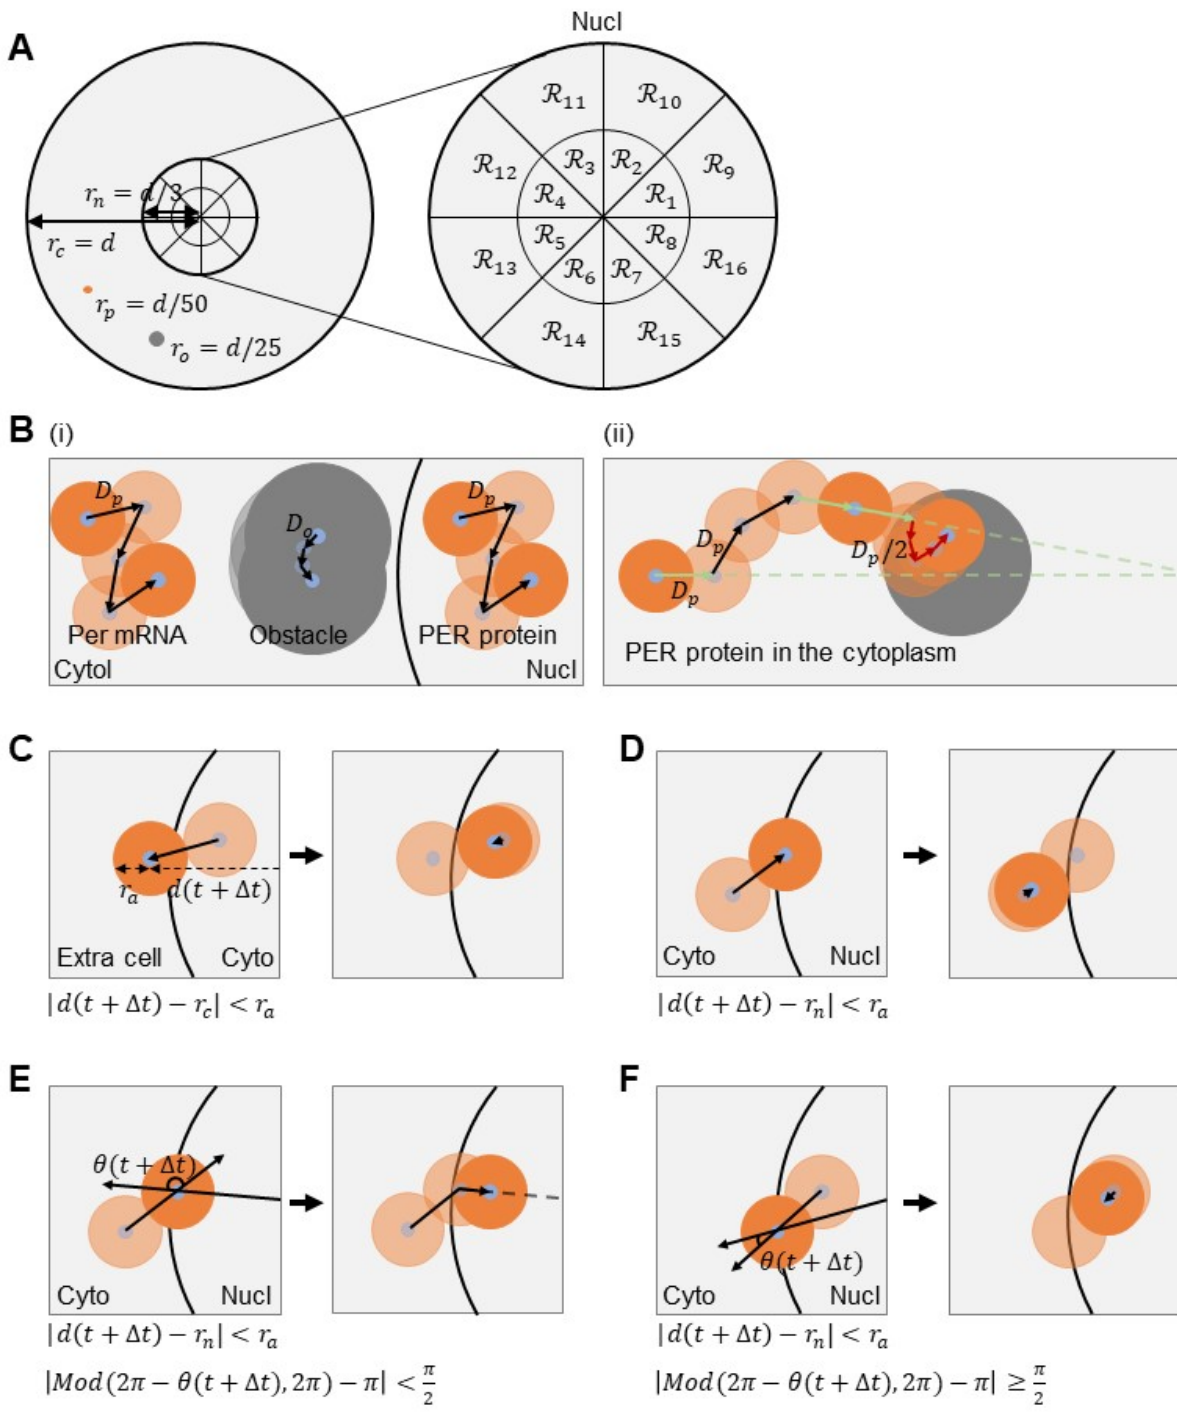

**Fig. S10. Description of model components and agent mobility.** (A) Shape and size of cell, nucleus, cytoplasmic obstacle, and PER molecules in the model. Their shape was defined as a circle. Their sizes were defined relative to the cell size. Specifically, relative to the cell radius ( $r_c = d$ ), the radius of the nucleus ( $r_n$ ), that of cytoplasmic obstacles ( $r_o$ ), and that of PER molecules ( $r_p$ ) were set to  $d/3$ ,  $d/25$  and  $d/50$ , respectively. The nucleus was divided into sixteen regions ( $\mathcal{R}_i$  for  $i = 1, \dots, 16$ ) to simulate *Per* mRNA transcription (see supplementary materials for details). (B) (i) PER protein and cytoplasmic obstacles randomly move at each time step  $\Delta t$  with step size  $D_p$  and  $D_o$ , respectively (see the methods). (ii) Cytoplasmic PER protein transits toward the perinucleus by the cytoplasmic flux: it heads to the nucleus with probability  $p_{advec}$  (green arrow) and randomly moves with probability  $1 - p_{advec}$  (black arrow). If PER protein is located in the region where the cytoplasmic flux is disrupted by the obstacles (gray

572  
573

585 circle), its speed decreased by  $D_p/2$  for  $\Delta t$  (red arrow). (C-F) The boundary condition of the  
586 model. The diameter of agents, i.e., obstacles or PER molecules, ( $r_a = r_o$  or  $r_p$ ) is set to be larger  
587 than their movement step size for  $\Delta t$  ( $r_p > D_p$  and  $r_o > D_o$ , see the methods). Thus, when the  
588 agent moves to the other compartments (extracellular space, cytoplasm or nucleus), it always  
589 overlaps with the boundary (cytoplasmic or nuclear membrane) (i.e.,  $|d(t + \Delta t) - r_c| < r_a$  or  
590  $|d(t + \Delta t) - r_n| < r_a$  where  $d(t + \Delta t)$  is the distance from the center of the cell to the position  
591 of agent at  $t + \Delta t$ ). When the agent overlaps with the boundary, the location of the agent was  
592 adjusted according to the following rules. 1) Agent cannot be exported out of the extracellular  
593 space. If the agent overlaps with the cytoplasmic membrane ( $|d(t + \Delta t) - r_c| < r_a$ ), its position  
594 is adjusted back to the position where it collided with the cytoplasmic membrane (C). 2) *Per*  
595 mRNA and hypophosphorylated PER cannot be imported into the nucleus: if they overlap with  
596 the nuclear membrane ( $|d(t + \Delta t) - r_n| < r_a$ ), their position is adjusted back to the position  
597 where they collided with the nuclear membrane (D). 3) Hyperphosphorylated PER is imported to  
598 the nucleus with a probability of  $p_{im}$  for  $\Delta t$ . If hyperphosphorylated PER overlaps with the  
599 nuclear membrane ( $|d(t + \Delta t) - r_n| < r_a$ ) and heads to the nucleus ( $|Mod(2\pi -$   
600  $\theta(t + \Delta t), 2\pi) - \pi| < \frac{\pi}{2}$ ), it further moves toward the center of the cell with a probability of  $p_{im}$   
601 until it touches the nuclear membrane inside the nucleus (E). 4) Hyperphosphorylated PER cannot  
602 be exported from the nucleus to the cytoplasm. If hyperphosphorylated PER overlaps with the  
603 nuclear membrane ( $|d(t + \Delta t) - r_n| < r_a$ ) and heads to the cytoplasm ( $|Mod(2\pi -$   
604  $\theta(t + \Delta t), 2\pi) - \pi| \geq \frac{\pi}{2}$ ), its position is adjusted back to the position where it collided with the  
605 nuclear membrane (F).  
606

607  
608

609 **Movie S1. Real time monitoring of PER2-Venus trafficking in U2OS cells.**

610

## 611 **References**

612

- 613 1. Chen R, D'Alessandro M, & Lee C (2013) miRNAs are required for generating a time  
614 delay critical for the circadian oscillator. *Curr Biol* 23(20):1959-1968.
- 615 2. Sundaram S, et al. (2019) Inhibition of casein kinase 1delta/epsilon improves cognitive-  
616 affective behavior and reduces amyloid load in the APP-PS1 mouse model of Alzheimer's  
617 disease. *Sci Rep* 9(1):13743.
- 618 3. Lee C, Etchegaray JP, Cagampang FR, Loudon AS, & Reppert SM (2001)  
619 Posttranslational mechanisms regulate the mammalian circadian clock. *Cell* 107(7):855-  
620 867.
- 621 4. Lee C, Weaver DR, & Reppert SM (2004) Direct association between mouse PERIOD  
622 and CKIepsilon is critical for a functioning circadian clock. *Mol Cell Biol* 24(2):584-594.
- 623 5. Jin YH, et al. (2019) Streamlined procedure for gene knockouts using all-in-one  
624 adenoviral CRISPR-Cas9. *Sci Rep* 9(1):277.
- 625 6. D'Alessandro M, et al. (2015) A tunable artificial circadian clock in clock-defective mice.  
626 *Nat Commun* 6:8587.
- 627 7. He TC, et al. (1998) A simplified system for generating recombinant adenoviruses. *Proc*  
628 *Natl Acad Sci U S A* 95(5):2509-2514.

- 629 8. Chen R, *et al.* (2009) Rhythmic PER abundance defines a critical nodal point for negative  
630 feedback within the circadian clock mechanism. *Mol Cell* 36(3):417-430.
- 631 9. Stevanovic K, *et al.* (2017) Disruption of normal circadian clock function in a mouse  
632 model of tauopathy. *Exp Neurol* 294:58-67.
- 633 10. Kim JK & Forger DB (2012) A mechanism for robust circadian timekeeping via  
634 stoichiometric balance. *Mol Syst Biol* 8:630.
- 635 11. Kim JK, Kilpatrick ZP, Bennett MR, & Josic K (2014) Molecular mechanisms that  
636 regulate the coupled period of the mammalian circadian clock. *Biophys J* 106(9):2071-  
637 2081.
- 638 12. Kim JK, Josic K, & Bennett MR (2015) The relationship between stochastic and  
639 deterministic quasi-steady state approximations. *Bmc Syst Biol* 9.
- 640 13. Kim JK (2016) Protein sequestration versus Hill-type repression in circadian clock  
641 models. *IET Syst Biol* 10(4):125-135.
- 642 14. D'Alessandro M, *et al.* (2017) Stability of Wake-Sleep Cycles Requires Robust  
643 Degradation of the PERIOD Protein. *Curr Biol* 27(22):3454-3467 e3458.
- 644 15. Bonabeau E (2002) Agent-based modeling: methods and techniques for simulating human  
645 systems. *Proceedings of the National Academy of Sciences of the United States of America*  
646 99 Suppl 3:7280-7287.
- 647 16. Sklar E (2007) NetLogo, a multi-agent simulation environment. *Artif Life* 13(3):303-311.
- 648 17. Alberts B (2008) *Molecular biology of the cell* (Garland Science, New York) 5th Ed.
- 649 18. Banisch S & Lima R (2015) Markov Chain Aggregation for Simple Agent-Based Models  
650 on Symmetric Networks: The Voter Model. *Adv Complex Syst* 18(3-4).
- 651 19. Gillespie DT (2001) Approximate accelerated stochastic simulation of chemically reacting  
652 systems. *J Chem Phys* 115(4):1716-1733.
- 653 20. Gardiner CW (2009) *Stochastic methods : a handbook for the natural and social sciences*  
654 (Springer, Berlin) 4th Ed pp xvii, 447 p.
- 655 21. Gillespie DT (1976) General Method for Numerically Simulating Stochastic Time  
656 Evolution of Coupled Chemical-Reactions. *J Comput Phys* 22(4):403-434.
- 657 22. Kampen NGv (2007) *Stochastic processes in physics and chemistry* (Elsevier, Amsterdam  
658 ; Boston) 3rd Ed pp xvi, 463 p.
- 659 23. El Samad H, Khammash M, Petzold L, & Gillespie D (2005) Stochastic modelling of gene  
660 regulatory networks. *Int J Robust Nonlin* 15(15):691-711.
- 661 24. Frazier Z & Alber F (2012) A Computational Approach to Increase Time Scales in  
662 Brownian Dynamics-Based Reaction-Diffusion Modeling. *J Comput Biol* 19(6):606-618.
- 663 25. Vanselow K, *et al.* (2006) Differential effects of PER2 phosphorylation: molecular basis  
664 for the human familial advanced sleep phase syndrome (FASPS). *Genes Dev* 20(19):2660-  
665 2672.
- 666 26. Zhou M, Kim JK, Eng GWL, Forger DB, & Virshup DM (2015) A Period2  
667 phosphoswitch regulates and temperature compensates circadian period. *Molecular cell*  
668 60(1):77-88.
- 669 27. Vanselow K & Kramer A (2007) Role of phosphorylation in the mammalian circadian  
670 clock. *Cold Spring Harbor symposia on quantitative biology*, (Cold Spring Harbor  
671 Laboratory Press), pp 167-176.
- 672 28. Tzafiriri AR (2003) Michaelis-Menten kinetics at high enzyme concentrations. *B Math*  
673 *Biol* 65(6):1111-1129.
- 674 29. Kumar A & Josic K (2011) Reduced models of networks of coupled enzymatic reactions.  
675 *Journal of theoretical biology* 278(1):87-106.
- 676 30. Barik D, Paul MR, Baumann WT, Cao Y, & Tyson JJ (2008) Stochastic simulation of  
677 enzyme-catalyzed reactions with disparate timescales. *Biophysical Journal* 95(8):3563-  
678 3574.



- 679 31. MacNamara S, Bersani AM, Burrage K, & Sidje RB (2008) Stochastic chemical kinetics  
680 and the total quasi-steady-state assumption: Application to the stochastic simulation  
681 algorithm and chemical master equation. *J Chem Phys* 129(9).
- 682 32. Kim JK, Josic K, & Bennett MR (2014) The Validity of Quasi-Steady-State  
683 Approximations in Discrete Stochastic Simulations. *Biophysical Journal* 107(3):783-793.
- 684 33. Soh S, Byrska M, Kandere-Grzybowska K, & Grzybowski BA (2010) Reaction-Diffusion  
685 Systems in Intracellular Molecular Transport and Control. *Angew Chem Int Edit*  
686 49(25):4170-4198.
- 687 34. Sturrock M, Terry AJ, Xirodimas DP, Thompson AM, & Chaplain MAJ (2011) Spatio-  
688 temporal modelling of the Hes1 and p53-Mdm2 intracellular signalling pathways. *Journal*  
689 *of theoretical biology* 273(1):15-31.
- 690 35. Sturrock M, Terry AJ, Xirodimas DP, Thompson AM, & Chaplain MAJ (2012) Influence  
691 of the Nuclear Membrane, Active Transport, and Cell Shape on the Hes1 and p53-Mdm2  
692 Pathways: Insights from Spatio-temporal Modelling. *B Math Biol* 74(7):1531-1579.
- 693 36. D'Onofrio A, Cerrai P, & Gandolfi A (2012) *New challenges for cancer systems*  
694 *biomedicine* (Springer Verlag, Milan ; New York) pp xi, 398 p.
- 695 37. Shibata Y, Voeltz GK, & Rapoport TA (2006) Rough sheets and smooth tubules. *Cell*  
696 126(3):435-439.
- 697 38. Narasimamurthy R, *et al.* (2018) CK1delta/epsilon protein kinase primes the PER2  
698 circadian phosphoswitch. *Proceedings of the National Academy of Sciences of the United*  
699 *States of America* 115(23):5986-5991.
- 700 39. Ollinger R, *et al.* (2014) Dynamics of the circadian clock protein PERIOD2 in living cells.  
701 *J Cell Sci* 127(Pt 19):4322-4328.
- 702 40. Smyllie NJ, *et al.* (2016) Visualizing and Quantifying Intracellular Behavior and  
703 Abundance of the Core Circadian Clock Protein PERIOD2. *Curr Biol* 26(14):1880-1886.
- 704 41. Hughes ME, Hogenesch JB, & Kornacker K (2010) JTK\_CYCLE: an efficient  
705 nonparametric algorithm for detecting rhythmic components in genome-scale data sets.  
706 *Journal of biological rhythms* 25(5):372-380.
- 707 42. Rombouts J, Vandervelde A, & Gelens L (2018) Delay models for the early embryonic  
708 cell cycle oscillator. *PLoS One* 13(3):e0194769.
- 709 43. Gelens L, Qian J, Bollen M, & Saurin AT (2018) The Importance of Kinase-Phosphatase  
710 Integration: Lessons from Mitosis. *Trends Cell Biol* 28(1):6-21.
- 711 44. Ferrell JE, Jr., Tsai TY, & Yang Q (2011) Modeling the cell cycle: why do certain circuits  
712 oscillate? *Cell* 144(6):874-885.
- 713
